# Supplementary material
Source: MDPI journal article supplement (https://www.mdpi.com/2413-4155/4/2/22)
Supplement: s1 [file s1]

Supplemental info

# Evolution of realistic organic mixtures for the origins of life through wet-dry cycling

Kiernan Foster <sup>1</sup>, Brooke Hillman <sup>1</sup>, Vahab Rajaei<sup>2</sup>, Kimsorn Seng <sup>1</sup> and Sarah Maurer <sup>1,\*</sup>

<sup>1</sup> Department of Chemistry and Biochemistry, Central Connecticut State University;

<sup>2</sup> Department of Chemistry and Biochemistry, Georgia Institute of Technology

Organic mixtures were prepared with the following chemicals in the listed amounts (Table S1). Table S2 is provided as a csv file and contains the dataset used to generate the PCA biplots.

**Table S1. Composition of organic mixture.**

| compound                     | mole amount |
|------------------------------|-------------|
| 2 and 3-methylbutanoic acid  | 0.00014742  |
| 2-ethylhexanoic acid         | 8.2028E-05  |
| 2-hexanone                   | 4.5431E-05  |
| 2-hydroxyisobutyric acid     | 1.1527E-05  |
| 2-methylheptanoic acid       | 9.059E-05   |
| 2-methylhexanoic acid        | 6.4171E-05  |
| 2-pentanone                  | 4.6473E-05  |
| 2-propylpentanoic acid       | 3.9335E-05  |
| 2-pyrrolidone                | 0.00217131  |
| 2,2-dimethylhexanoic acid    | 4.0392E-05  |
| 3-pentanone (diethyl ketone) | 6.1506E-05  |
| 4-methyloctanoic acid        | 6.4408E-05  |
| 4-methylpentanoic acid       | 5.3159E-05  |
| acetamide                    | 0.00084476  |
| acetone                      | 8.5937E-05  |
| adipic                       | 0.00034898  |
| alanine                      | 8.4185E-05  |
| alpha-aminobutyric acid      | 3.685E-05   |
| alpha-aminoisobutyric acid   | 0.00022304  |
| ammonia                      | 0.12101462  |
| aspartic acid                | 0.00111637  |
| benzaldehyde                 | 0.00023513  |
| benzoic acid                 | 8.8438E-05  |
| beta-alanine                 | 2.9183E-05  |
| butyraldehyde                | 2.6733E-05  |

**Citation:** Foster, K.; Hillman, B.; Rajaei, V.; Seng, K.; Maurer, S. Evolution of Realistic Organic Mixtures for the Origins of Life through Wet–Dry Cycling. *Sci* **2022**, *4*, 22. <https://doi.org/10.3390/sci4020022>

Academic Editor: Claus Jacob

Received: 21 February 2022

Accepted: 23 May 2022

Published: 27 May 2022

**Publisher's Note:** MDPI stays neutral with regard to jurisdictional claims in published maps and institutional affiliations.

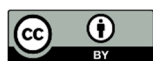

**Copyright:** © 2022 by the authors. Submitted for possible open access publication under the terms and conditions of the Creative Commons Attribution (CC BY) license (<https://creativecommons.org/licenses/by/4.0/>).

|                                  |                        |
|----------------------------------|------------------------|
| cyclohexanone                    | 0.00011442             |
| D-2-hydroxy-3-methylbutyric acid | 1.1005E-05             |
| D,L-2-hydroxycaproic acid        | 2.8753E-05             |
| decanoic acid                    | 3.309E-05              |
| erythronic/threonic acid         | 0.00036957             |
| ethanol                          | 0.09287998             |
|                                  | bubbled for 10 seconds |
| ethylamine                       | 0.03285208             |
| ethylsulfonic acid               | 1.8481E-05             |
| formaldehyde                     | 2.6504E-05             |
| formic acid                      | 3.6023E-05             |
| glutamic acid                    | 0.00163292             |
| glutarimide                      | 0.00014965             |
| glyceric acid                    | 0.00029924             |
| glycerol                         | 0.00019582             |
| glycine                          | 2.7613E-05             |
| glycolic acid                    | 8.9028E-06             |
| hexanal                          | 0.00044456             |
| hexanoamide                      | 0.00303982             |
| iminodiacetic                    | 5.2603E-05             |
| isovaline                        | 4.0164E-05             |
| L-lactic acid                    | 0.00055562             |
| lactamide                        | 0.00088121             |
| malonic acid                     | 0.15510772             |
| methanol                         | 0.00335059             |
| methyl nicotinic acid            | 2.7078E-05             |
| methyl phosphonic acid           | 0.00029824             |
| methyl succinic acid             | 0.06544584             |
| methyl sulfonic acid             | 0.00093484             |
| methylaniline                    | 0.0026379              |
| N-acetyl-glutamic acid           | 0.0004321              |
| N-acetyl-glycine                 | 0.00463112             |
| N-propyl sulfonic acid           | 0.00375357             |
| nicotinic acid                   | 0.00011681             |
| nonanoic acid                    | 6.8655E-05             |
| octanoic acid                    | 0.00163773             |
| parabanic acid                   | 0.0010005              |
| phosphoric acid (15 M)           | 2.9532E-05             |
| proline                          | 1.9494E-05             |
| propionaldehyde                  | 0.00143289             |
| pyroglutamic acid                |                        |

---

|                         |            |
|-------------------------|------------|
| sodium bicarbonate      | 0.00998785 |
| sodium triphosphate     | 0.00273742 |
| succinic acid           | 0.00071725 |
| succinimide             | 0.00190938 |
| sulfuric acid (18.05 M) | 0.01001775 |
| urea                    | 0.05678322 |
| valine                  | 2.4754E-05 |
